# Supplementary material for: Discovery and Validation of Novel Biomarkers for Detection of Epithelial Ovarian Cancer
Source: MDPI journal article supplement (doi:10.3390/cells8070713), 2019-07-12
Supplement: s1 [file s1]

**Table S2.** List of differentially expressed genes between benign and malignant epithelial and stromal tissue

(I) malignant versus benign epithelium

| HGNC_symbol | logFC |
|-------------|-------|
| CENPF       | 4.12  |
| CDC6        | 3.43  |
| CLSPN       | 3.17  |
| RGS2        | 3.01  |
| RRM2        | 2.95  |
| DTL         | 2.92  |
| DLGAP5      | 2.91  |
| PRDM1       | 2.8   |
| CENPF       | 2.77  |
| MMP15       | 2.69  |
| IQGAP3      | 2.67  |
| ICMT        | 2.52  |
| SPP1        | 2.5   |
| AURKA       | 2.46  |
| CENPF       | 2.35  |
| WDR76       | 2.29  |
| ISG15       | 2.2   |
| SPP1        | 2.08  |
| ICMT        | 2.04  |
| ORC6        | 1.99  |
| C6orf203    | 1.95  |
| CLDN6       | 1.86  |
| LRP2        | 1.86  |
| NPC2        | 1.85  |
| H1FO        | 1.83  |
| RALBP1      | 1.81  |
| CHCHD3      | 1.8   |
| APEX2       | 1.8   |
| C19orf55    | 1.79  |
| C1orf106    | 1.76  |
| SOX17       | 1.76  |
| GPX1        | 1.69  |
| CRABP2      | 1.69  |
| IFI44L      | 1.61  |
| NDC80       | 1.55  |
| CALR        | 1.52  |
| UBE2D3      | 1.51  |
| NCOA7       | 1.51  |
| GATAD2A     | 1.5   |
| NOTCH3      | 1.47  |
| PTP4A2      | 1.47  |
| FGF9        | 1.46  |
| MELK        | 1.45  |
| RHBDL2      | 1.43  |
| MIOS        | 1.41  |
| ZFYVE16     | 1.41  |
| TSEN54      | 1.39  |
| PHOSPHO2-K  | 1.38  |
| BHLHE40     | 1.36  |
| KIAA1143    | 1.32  |
| SNX5        | 1.27  |
| LOC284023   | 1.26  |
| PCBP1       | 1.26  |
| ZNF770      | 1.24  |
| MYH7        | 1.23  |
| MRPS12      | 1.21  |
| XPO4        | 1.2   |
| SCD         | 1.19  |
| RASGEF1B    | 1.19  |
| LRRC37A2    | 1.18  |
| VKORC1L1    | 1.17  |
| FUCA2       | 1.16  |
| KIAA1654    | 1.15  |
| ZNF525      | 1.11  |
| SEMA4C      | 1.09  |
| AP2M1       | 1.07  |
| ATP6V0A2    | 1.06  |
| RPN2        | 1.06  |
| PFDN2       | 1.05  |
| RALY        | 1.05  |
| S100A8      | 1.02  |
| SCNM1       | 1.01  |
| CYP4V2      | 1.01  |
| SNRPG       | 1     |
| CTBP1-AS1   | -1    |
| UBE2J1      | -1.02 |
| EPB41L4A-AS | -1.03 |
| RPS26P11    | -1.05 |
| COG6        | -1.05 |
| SAFB        | -1.07 |
| LOC10065299 | -1.07 |
| BCR         | -1.07 |
| NCKIPSD     | -1.08 |
| OGT         | -1.08 |
| DNAAF1      | -1.08 |
| CDC73       | -1.08 |
| LDLRAD1     | -1.1  |
| WDR78       | -1.1  |
| SMPD3       | -1.11 |
| DHX38       | -1.11 |

(II) malignant versus benign stroma

| HGNC_symbol  | logFC |
|--------------|-------|
| CXCR7        | 3.49  |
| EFEMP1       | 3.36  |
| LOC10013399  | 3.35  |
| SLIT2        | 3.28  |
| CD53         | 2.86  |
| FYB          | 2.85  |
| NNMT         | 2.65  |
| MAFB         | 2.49  |
| EFEMP1       | 2.37  |
| PLEK         | 2.35  |
| ZDHHC14      | 2.29  |
| ITGA4        | 2.21  |
| CFB          | 2.15  |
| RAPH1        | 2.11  |
| S100A8       | 1.8   |
| DNMT3B       | 1.78  |
| ARL4C        | 1.76  |
| LMF2         | 1.74  |
| UTRN         | 1.72  |
| AGFG1        | 1.67  |
| S100A4       | 1.66  |
| HLA-E        | 1.62  |
| SPRY1        | 1.54  |
| ADAMTSL5     | 1.48  |
| CCDC14       | 1.46  |
| NPC2         | 1.45  |
| EMB          | 1.44  |
| CXCR4        | 1.44  |
| PYCR2        | 1.43  |
| DHX8         | 1.42  |
| CXCR4        | 1.4   |
| LOC100652808 | 1.4   |
| CMPK2        | 1.39  |
| CSH1         | 1.36  |
| BSN          | 1.32  |
| GUCY1A3      | 1.32  |
| LOC400707    | 1.3   |
| BMPR2        | 1.24  |
| CRIPAK       | 1.22  |
| CAMK1G       | 1.21  |
| C6orf106     | 1.2   |
| LAPTM5       | 1.17  |
| TCF4         | 1.16  |
| TBC1D24      | 1.16  |
| SNX18        | 1.14  |
| FCER1G       | 1.13  |
| OXSRI        | 1.13  |
| CUEDC1       | 1.11  |
| CFB          | 1.1   |
| C4orf46      | 1.09  |
| TAGLN        | 1.09  |
| SLCO4A1      | 1.07  |
| TRIM71       | 1.07  |
| MYL8P        | 1.06  |
| NFKBIZ       | 1.06  |
| FKBP8        | 1.06  |
| SLC17A7      | 1.04  |
| STK17B       | 1.01  |
| FLJ27352     | -1.01 |
| HNRNPA1      | -1.01 |
| ZNF334       | -1.03 |
| NUDCD2       | -1.05 |
| PAIP2B       | -1.06 |
| LOC284023    | -1.07 |
| HNRNPA1      | -1.08 |
| NMD3         | -1.08 |
| TLR6         | -1.09 |
| RPS4X        | -1.1  |
| KLHL11       | -1.11 |
| ATPIF1       | -1.11 |
| SRSF3        | -1.13 |
| HOXD3        | -1.14 |
| MRPL9        | -1.16 |
| RGNEF        | -1.22 |
| IGLCOR22-1   | -1.22 |
| STK33        | -1.24 |
| TSPAN5       | -1.27 |
| CMYA5        | -1.31 |
| NUFIP1       | -1.34 |
| STRN         | -1.34 |
| COQ5         | -1.35 |
| C3orf38      | -1.35 |
| CUL4A        | -1.37 |
| LGR4         | -1.37 |
| SECISBP2L    | -1.39 |
| LOC440297    | -1.41 |
| ANKRD36C     | -1.43 |
| ACTR8        | -1.44 |
| SUSD5        | -1.44 |
| METTL8       | -1.45 |

(III) malignant versus benign tumors combined

| HGNC_symbol | logFC |
|-------------|-------|
| CENPF       | 2.56  |
| IQGAP3      | 2.47  |
| CXCR7       | 2.45  |
| MX1         | 2.36  |
| EPSTI1      | 2.31  |
| RGS2        | 2.29  |
| SPP1        | 2.22  |
| CXCR4       | 2.17  |
| RRM2        | 2.11  |
| S100A8      | 2.07  |
| SOC33       | 2.03  |
| NANP        | 2.01  |
| OAS2        | 1.98  |
| CLSPN       | 1.98  |
| LYZ         | 1.97  |
| VCAN        | 1.93  |
| MXD1        | 1.88  |
| LOC10013399 | 1.84  |
| MT1G        | 1.81  |
| LEF1        | 1.8   |
| ISG15       | 1.76  |
| IFI44L      | 1.75  |
| TINAGL1     | 1.75  |
| ZDHHC14     | 1.73  |
| SLIT2       | 1.73  |
| FGF9        | 1.72  |
| DDX42       | 1.71  |
| FGF18       | 1.7   |
| PLEK        | 1.69  |
| BMP7        | 1.69  |
| NFKBIZ      | 1.69  |
| ARL4C       | 1.68  |
| CENPF       | 1.68  |
| IFI44L      | 1.67  |
| NCOA7       | 1.65  |
| RGS5        | 1.65  |
| STAT1       | 1.63  |
| VCAN        | 1.63  |
| NPC2        | 1.62  |
| UBE2C       | 1.62  |
| AURKA       | 1.61  |
| UGP2        | 1.58  |
| TNFSF10     | 1.58  |
| OLFML2B     | 1.58  |
| THBD        | 1.58  |
| VCAN        | 1.57  |
| FUT2        | 1.56  |
| DLGAP5      | 1.55  |
| CLIC4       | 1.54  |
| MYCL1       | 1.53  |
| KDM5C       | 1.53  |
| IFI44L      | 1.52  |
| SDC3        | 1.52  |
| CD53        | 1.51  |
| ANGEL2      | 1.5   |
| IFITM1      | 1.49  |
| ACTR3       | 1.48  |
| FYB         | 1.48  |
| CFB         | 1.47  |
| SOX11       | 1.47  |
| NCOA7       | 1.46  |
| DHDDS       | 1.46  |
| PIM2        | 1.46  |
| RIT1        | 1.46  |
| CDC6        | 1.45  |
| CCT3        | 1.44  |
| EFEMP1      | 1.44  |
| CXCL17      | 1.44  |
| CFI         | 1.43  |
| GPX1        | 1.42  |
| GPRC5A      | 1.42  |
| ZNF566      | 1.41  |
| ST20        | 1.4   |
| APOC1       | 1.4   |
| LHX1        | 1.39  |
| GADD45B     | 1.39  |
| LUM         | 1.39  |
| NFKBIA      | 1.38  |
| TATDN1      | 1.38  |
| LYZ         | 1.37  |
| CENPF       | 1.37  |
| LCP1        | 1.36  |
| SLC44A3     | 1.36  |
| MMP15       | 1.36  |
| CDC5L       | 1.36  |
| PRDM1       | 1.35  |
| CRABP2      | 1.34  |
| APLP1       | 1.34  |
| FCER1G      | 1.34  |
| SOX11       | 1.34  |

|             |       |
|-------------|-------|
| CEP63       | -1,13 |
| MXRA7       | -1,13 |
| AGBL4-IT1   | -1,14 |
| IST1        | -1,14 |
| SPEF2       | -1,14 |
| LOC150197   | -1,15 |
| KIAA1430    | -1,16 |
| ALG12       | -1,16 |
| STK33       | -1,16 |
| LOC10050730 | -1,17 |
| TCEAL8      | -1,18 |
| FECH        | -1,18 |
| FBXO21      | -1,19 |
| CBR4        | -1,19 |
| PKD3        | -1,2  |
| IGBP1       | -1,2  |
| METAP1D     | -1,2  |
| CLDN18      | -1,21 |
| PHAX        | -1,22 |
| PJA2        | -1,22 |
| FLJ44342    | -1,23 |
| ATG2B       | -1,23 |
| ATP13A3     | -1,23 |
| TF          | -1,24 |
| BEX4        | -1,25 |
| ITGB3       | -1,26 |
| C18orf25    | -1,27 |
| OGT         | -1,29 |
| ANK2        | -1,29 |
| CEP70       | -1,31 |
| PCCB        | -1,32 |
| SPATA6L     | -1,34 |
| VWA3A       | -1,35 |
| N4BP2L2     | -1,35 |
| HYDIN       | -1,35 |
| TCF25       | -1,38 |
| LOC10013000 | -1,41 |
| ADAM6       | -1,45 |
| FN1         | -1,48 |
| CLCN3       | -1,52 |
| JAM2        | -1,58 |
| NAP1L3      | -1,58 |
| LENG8       | -1,59 |
| METAP1D     | -1,6  |
| TTC18       | -1,6  |
| SCAMP1      | -1,61 |
| VPS53       | -1,63 |
| ABCE1       | -1,68 |
| MAF         | -1,69 |
| TAPT1       | -1,7  |
| NRP2        | -1,74 |
| MRPL10      | -1,78 |
| KCTD12      | -1,79 |
| MGLL        | -1,85 |
| GRAMD3      | -1,86 |
| PPWD1       | -1,88 |
| MYLK3       | -1,89 |
| CCDC11      | -1,9  |
| NAIP        | -1,9  |
| LYSMD3      | -1,93 |
| LOC284009   | -1,94 |
| BIVM        | -1,96 |
| PTGS2       | -2,14 |
| OGT         | -2,17 |
| NEXN        | -2,17 |
| CYP4V2      | -2,18 |
| MBP         | -2,19 |
| DNAAF1      | -2,22 |
| ZNF177      | -2,24 |
| RORA        | -2,32 |
| LOC10050694 | -2,49 |
| GOSR1       | -2,62 |
| DNALI1      | -2,62 |
| HSDL1       | -2,65 |
| NME5        | -2,7  |
| ESYT3       | -2,8  |
| AR          | -2,82 |
| RBM24       | -3,12 |
| OVGP1       | -3,16 |

|             |       |
|-------------|-------|
| NXT2        | -1,45 |
| PWRN1       | -1,46 |
| FLJ30901    | -1,48 |
| NUDT11      | -1,48 |
| PDIA3       | -1,49 |
| ABI2        | -1,49 |
| DOK6        | -1,5  |
| NFE2L1      | -1,52 |
| SMS         | -1,55 |
| ACTR5       | -1,55 |
| SIGLEC11    | -1,59 |
| METTL21B    | -1,62 |
| C12orf35    | -1,63 |
| LINC00515   | -1,64 |
| TRA2B       | -1,66 |
| PEG10       | -1,67 |
| C2orf29     | -1,68 |
| DEFB109P1B  | -1,69 |
| OCLN        | -1,69 |
| DPF3        | -1,69 |
| KDM5B       | -1,7  |
| HS3ST1      | -1,72 |
| ZNF737      | -1,72 |
| ZZZ3        | -1,73 |
| LOC10050730 | -1,73 |
| SIN3A       | -1,75 |
| PDZD4       | -1,75 |
| CDK12       | -1,75 |
| TOMM22      | -1,76 |
| PTCD3       | -1,76 |
| RALGAPB     | -1,76 |
| CCNJL       | -1,76 |
| NLE1        | -1,76 |
| BEX5        | -1,78 |
| FICD        | -1,78 |
| LCLAT1      | -1,79 |
| BICD1       | -1,79 |
| DENND5B     | -1,79 |
| SCYL2       | -1,84 |
| MYO5C       | -1,88 |
| CDH1        | -1,89 |
| GLS2        | -1,89 |
| PRDX4       | -1,89 |
| CD160       | -1,94 |
| TAB3        | -1,95 |
| RBM15       | -1,96 |
| BICD1       | -1,96 |
| RLIM        | -1,98 |
| TMEM39A     | -1,98 |
| WDR77       | -2,02 |
| LRIG2       | -2,03 |
| NRCAM       | -2,04 |
| SIKE1       | -2,05 |
| IFT81       | -2,07 |
| IGSF11      | -2,07 |
| ASXL3       | -2,07 |
| HUWE1       | -2,11 |
| C21orf62    | -2,11 |
| SNHG1       | -2,17 |
| PKNOX1      | -2,17 |
| PTCD3       | -2,18 |
| TH1L        | -2,19 |
| TRIM33      | -2,2  |
| PWRN2       | -2,2  |
| C12orf35    | -2,21 |
| ATF5        | -2,21 |
| SEL1L       | -2,22 |
| LOC10050694 | -2,23 |
| MEIS3P1     | -2,26 |
| ANP32A      | -2,27 |
| C14orf118   | -2,28 |
| ZFAND6      | -2,28 |
| ANK2        | -2,28 |
| RUNDC1      | -2,33 |
| CCDC77      | -2,34 |
| DYNC1H1     | -2,35 |
| USP22       | -2,36 |
| WNK1        | -2,38 |
| TMEM184C    | -2,38 |
| HMGB3       | -2,4  |
| TDGF1P3     | -2,44 |
| ZNF385B     | -2,54 |
| CLCN3       | -2,57 |
| SP1         | -2,58 |
| ZNF75D      | -2,58 |
| TMBIM4      | -2,6  |
| RPRD1B      | -2,61 |
| FAM223A     | -2,68 |
| DCTN5       | -2,69 |
| C12orf51    | -2,69 |
| FLG-AS1     | -2,73 |
| FAM120C     | -2,81 |
| MEG3        | -2,88 |
| UBFD1       | -2,98 |
| SNORD116@   | -3,05 |
| BICD1       | -3,09 |

|           |      |
|-----------|------|
| C5orf22   | 1,33 |
| DSE       | 1,33 |
| RAPH1     | 1,32 |
| IFI27     | 1,32 |
| CLDN6     | 1,31 |
| LDLR      | 1,31 |
| ADAR      | 1,31 |
| HINT3     | 1,31 |
| BLZF1     | 1,31 |
| GNAO1     | 1,3  |
| TOR1AIP2  | 1,29 |
| SPP1      | 1,29 |
| IRF9      | 1,29 |
| DDX60L    | 1,29 |
| BIRC2     | 1,29 |
| NQO1      | 1,28 |
| RAB13     | 1,28 |
| RPS7      | 1,27 |
| RBM10     | 1,26 |
| BHLHE40   | 1,26 |
| IFI44     | 1,26 |
| SLC6A8    | 1,25 |
| CDCP1     | 1,25 |
| RUNX2     | 1,25 |
| MCM6      | 1,25 |
| ICMT      | 1,25 |
| PVRL4     | 1,25 |
| ATN1      | 1,24 |
| C1orf106  | 1,24 |
| IL17D     | 1,24 |
| NXPE3     | 1,24 |
| GPRC5A    | 1,24 |
| MAL       | 1,24 |
| FAM32A    | 1,23 |
| RNPEP     | 1,23 |
| STAU1     | 1,23 |
| CMPK2     | 1,22 |
| NFIL3     | 1,22 |
| RGS1      | 1,22 |
| NNMT      | 1,22 |
| MAFB      | 1,22 |
| COIL      | 1,22 |
| TIAF1     | 1,22 |
| PIM1      | 1,21 |
| RABGAP1L  | 1,21 |
| HIST2H2AB | 1,21 |
| RUNX2     | 1,21 |
| CAMK2D    | 1,21 |
| KLF13     | 1,21 |
| COL3A1    | 1,21 |
| MARK3     | 1,2  |
| PRRX1     | 1,2  |
| ORC6      | 1,2  |
| PSMD6-AS2 | 1,2  |
| C1orf116  | 1,2  |
| BMF       | 1,2  |
| VPS13D    | 1,2  |
| BHLHE40   | 1,19 |
| NOTCH3    | 1,19 |
| CKAP2L    | 1,19 |
| H1FO      | 1,19 |
| VCAN      | 1,19 |
| FN1       | 1,19 |
| NUSAP1    | 1,19 |
| CTGF      | 1,19 |
| CXCR4     | 1,18 |
| GPRC5A    | 1,18 |
| FUCA2     | 1,18 |
| SLIT2     | 1,18 |
| DYRK2     | 1,18 |
| LRRC41    | 1,17 |
| TSC22D2   | 1,17 |
| FN1       | 1,17 |
| GNL3L     | 1,16 |
| CYP1B1    | 1,16 |
| STK17B    | 1,16 |
| OAS3      | 1,16 |
| CYP1B1    | 1,16 |
| UCA1      | 1,15 |
| COL6A3    | 1,15 |
| COL5A2    | 1,15 |
| BCL2L1    | 1,14 |
| H1FO      | 1,14 |
| BCL11A    | 1,14 |
| IFIH1     | 1,14 |
| RHOA      | 1,14 |
| GPRC5B    | 1,14 |
| CXCR4     | 1,13 |
| CFB       | 1,13 |
| FAM129A   | 1,13 |
| IFT1      | 1,13 |
| TIGIT     | 1,13 |
| SERTAD2   | 1,13 |
| ATP1B1    | 1,13 |
| STXBP6    | 1,13 |
| HIST1H3I  | 1,12 |

|        |       |
|--------|-------|
| AP2B1  | -3,13 |
| MLXIP  | -3,17 |
| ACSM4  | -3,31 |
| CCNB1  | -3,43 |
| NOL9   | -3,52 |
| TSPAN5 | -3,82 |

|              |       |
|--------------|-------|
| ANKRD27      | 1,12  |
| PDLIM5       | 1,12  |
| SFRP2        | 1,12  |
| PRRX1        | 1,12  |
| THBS1        | 1,12  |
| RASGEF1B     | 1,11  |
| ARL4C        | 1,11  |
| FURIN        | 1,11  |
| SOX17        | 1,11  |
| PVRL3        | 1,11  |
| IL1R1        | 1,11  |
| LGALS1       | 1,11  |
| FGF7         | 1,1   |
| CDC47        | 1,1   |
| S100A4       | 1,09  |
| LOC284581    | 1,09  |
| IL1RAP       | 1,09  |
| RRM2         | 1,09  |
| EFEMP1       | 1,09  |
| CCDC102B     | 1,09  |
| VCAN         | 1,08  |
| GCH1         | 1,08  |
| UCA1         | 1,08  |
| PRIMA1       | 1,08  |
| ZDHHC9       | 1,07  |
| FAM129A      | 1,07  |
| CCBP2        | 1,07  |
| PIGA         | 1,07  |
| ARL6IP5      | 1,07  |
| ICMT         | 1,07  |
| SNX9         | 1,07  |
| DCUN1D3      | 1,07  |
| CXCL3        | 1,06  |
| STK17B       | 1,06  |
| EOGT         | 1,06  |
| TFE3         | 1,06  |
| WDR5B        | 1,06  |
| FOXQ1        | 1,06  |
| UNC5C        | 1,06  |
| LOC100653329 | 1,06  |
| MAN1A1       | 1,06  |
| STXBP6       | 1,06  |
| COL3A1       | 1,06  |
| NAMPT        | 1,05  |
| CAMK2D       | 1,05  |
| C19orf55     | 1,05  |
| ILDR2        | 1,05  |
| ITGA4        | 1,05  |
| DTX3L        | 1,05  |
| STAT1        | 1,04  |
| HLA-L        | 1,04  |
| TRNT1        | 1,04  |
| FAM174B      | 1,04  |
| KIAA1919     | 1,04  |
| SFRP2        | 1,04  |
| DNMT3B       | 1,03  |
| RAB3D        | 1,03  |
| NR2F6        | 1,03  |
| LDLR         | 1,03  |
| CDC42EP4     | 1,03  |
| BMPR2        | 1,02  |
| LRP2         | 1,02  |
| EMP1         | 1,02  |
| DSC3         | 1,02  |
| HIST1H4L     | 1,02  |
| IL1RN        | 1,02  |
| ERC1         | 1,02  |
| CSNK2A1P     | 1,02  |
| PHF20        | 1,02  |
| IFI44L       | 1,01  |
| APOLD1       | 1,01  |
| RNF19A       | 1,01  |
| CBX4         | 1,01  |
| KCNQ1OT1     | 1,01  |
| CCDC109B     | 1     |
| TAGLN2       | 1     |
| GPRC5A       | 1     |
| LOC100652809 | 1     |
| KIRREL       | 1     |
| RAPH1        | 1     |
| HMGCS2       | 1     |
| HOXD4        | -1    |
| TMEM231      | -1    |
| ZNF286A      | -1    |
| FEM1B        | -1    |
| PAK2         | -1    |
| NFE2L1       | -1    |
| SCD5         | -1    |
| KLHL4        | -1,01 |
| DTWD1        | -1,01 |
| RPRD1A       | -1,01 |
| RAB2B        | -1,01 |
| CCDC146      | -1,01 |
| BPTF         | -1,01 |
| PAFAH1B1     | -1,01 |
| H19          | -1,01 |

|              |       |
|--------------|-------|
| GNAS         | -1.01 |
| PCOLCE2      | -1.01 |
| MAGED1       | -1.01 |
| USP32P2      | -1.01 |
| GNG2         | -1.01 |
| TDRD3        | -1.01 |
| NTS          | -1.01 |
| FGFR1OP2     | -1.01 |
| NRP2         | -1.01 |
| CSRNP3       | -1.01 |
| IGBP1        | -1.02 |
| KIAA1430     | -1.02 |
| SRSF12       | -1.02 |
| DNAJC3       | -1.02 |
| UBE3B        | -1.02 |
| MIB1         | -1.02 |
| PAIP1        | -1.02 |
| TCFL5        | -1.02 |
| ACAP2        | -1.02 |
| VAMP4        | -1.02 |
| IQGAP1       | -1.02 |
| RASA1        | -1.02 |
| ENC1         | -1.02 |
| MORC4        | -1.02 |
| WNK1         | -1.02 |
| EPG5         | -1.02 |
| THUMPD1      | -1.02 |
| SLC4A4       | -1.02 |
| CDH1         | -1.02 |
| SPG20        | -1.02 |
| DPF3         | -1.03 |
| SMAD2        | -1.03 |
| NFE2L1       | -1.03 |
| LAMP2        | -1.03 |
| ZNF615       | -1.03 |
| SRRM1        | -1.03 |
| RHOXF2       | -1.03 |
| ANO4         | -1.03 |
| ZNF420       | -1.03 |
| C5orf15      | -1.03 |
| SLC35B1      | -1.03 |
| NEFH         | -1.03 |
| AKAP12       | -1.03 |
| TBL1X        | -1.03 |
| PWRN1        | -1.04 |
| TF           | -1.04 |
| LEPR         | -1.04 |
| UBXN7        | -1.04 |
| ZNF641       | -1.04 |
| NID2         | -1.04 |
| DDX17        | -1.04 |
| NRK          | -1.04 |
| SPRR2E       | -1.04 |
| BICD1        | -1.04 |
| RPS23        | -1.04 |
| CDK12        | -1.04 |
| GOLGA8A      | -1.04 |
| CDH2         | -1.04 |
| BRWD1        | -1.04 |
| NAA30        | -1.04 |
| FAM165B      | -1.04 |
| LRAT         | -1.04 |
| MEG3         | -1.04 |
| NFE2L1       | -1.05 |
| KDM5B        | -1.05 |
| EML5         | -1.05 |
| IFT57        | -1.05 |
| EPH2AIP1     | -1.05 |
| ESYT3        | -1.05 |
| ABCA10       | -1.05 |
| LEPR         | -1.05 |
| MIR1         | -1.05 |
| ADAMTS3      | -1.05 |
| GRB14        | -1.05 |
| KLHL5        | -1.05 |
| METAP1D      | -1.06 |
| CDK12        | -1.06 |
| LARS2        | -1.06 |
| LOC100507031 | -1.06 |
| GPD2         | -1.06 |
| ETV5         | -1.06 |
| CNBP         | -1.06 |
| N4BP2L1      | -1.06 |
| RBM25        | -1.06 |
| NLRP1        | -1.06 |
| OSBPL1A      | -1.06 |
| B3GALNT2     | -1.06 |
| CEP63        | -1.07 |
| SMAD2        | -1.07 |
| THOC2        | -1.07 |
| SRSF11       | -1.07 |
| U2SURP       | -1.07 |
| KCTD12       | -1.07 |
| KLC4         | -1.07 |
| C14orf118    | -1.07 |
| PGAM5        | -1.07 |

|              |       |
|--------------|-------|
| TTC8         | -1,07 |
| ZMYM2        | -1,07 |
| LOC100130560 | -1,07 |
| JPX          | -1,08 |
| C1orf168     | -1,08 |
| ESD          | -1,08 |
| SPRR2D       | -1,08 |
| SCN2A        | -1,08 |
| KLF3         | -1,08 |
| C21orf62     | -1,08 |
| ZFP90        | -1,08 |
| BOD1L1       | -1,08 |
| C4orf29      | -1,08 |
| LOC100506966 | -1,09 |
| TAF7         | -1,09 |
| MYO5C        | -1,09 |
| TMCC1        | -1,09 |
| THEM4        | -1,09 |
| PDHB         | -1,09 |
| ZNF207       | -1,09 |
| SRSF1        | -1,09 |
| PRPF39       | -1,09 |
| STX8         | -1,09 |
| TMOD2        | -1,09 |
| ANKRD29      | -1,09 |
| TCF12        | -1,09 |
| CPD          | -1,09 |
| LOC100289230 | -1,09 |
| C7           | -1,09 |
| C12orf35     | -1,1  |
| DEFB109P1B   | -1,1  |
| OCLN         | -1,1  |
| MTND5P2      | -1,1  |
| RALBP1       | -1,1  |
| RBM26        | -1,1  |
| UBE2A        | -1,1  |
| SEPP1        | -1,1  |
| DCLK1        | -1,1  |
| TRIM2        | -1,1  |
| TNRC6B       | -1,1  |
| MBOAT2       | -1,1  |
| KAT2B        | -1,1  |
| ARHGAP24     | -1,1  |
| NAV3         | -1,1  |
| LINC00515    | -1,11 |
| SCN7A        | -1,11 |
| PDZD4        | -1,11 |
| TSPAN6       | -1,11 |
| LTB4R        | -1,12 |
| CYB5D1       | -1,12 |
| SLITRK4      | -1,12 |
| SCFD1        | -1,12 |
| MINA         | -1,12 |
| USMG5P1      | -1,12 |
| GPX3         | -1,12 |
| PRTG         | -1,12 |
| ANKRD36C     | -1,13 |
| C1orf173     | -1,13 |
| IGSF11       | -1,13 |
| TAB3         | -1,13 |
| ITGA6        | -1,13 |
| ADAMTS9-AS1  | -1,13 |
| RBBP6        | -1,13 |
| B4GALT4      | -1,13 |
| SPAG8        | -1,13 |
| ZNF14        | -1,13 |
| PPP2R2C      | -1,13 |
| NDEL1        | -1,13 |
| PTPLB        | -1,13 |
| PKHD1L1      | -1,13 |
| KLHL11       | -1,13 |
| NRP2         | -1,13 |
| TGFB2        | -1,13 |
| DENND5B      | -1,14 |
| SOBP         | -1,14 |
| UNC119B      | -1,14 |
| URI1         | -1,14 |
| GTF2F1       | -1,14 |
| ALDH3A2      | -1,14 |
| REV1         | -1,14 |
| FAT4         | -1,14 |
| WNT5A        | -1,14 |
| SYNJ2BP      | -1,14 |
| BEX4         | -1,15 |
| SPATA18      | -1,15 |
| PNN          | -1,15 |
| FAM210B      | -1,15 |
| ZNF552       | -1,15 |
| LOC100129104 | -1,15 |
| PDCD7        | -1,15 |
| DERL2        | -1,15 |
| MINOS1       | -1,15 |
| HNRNPA1      | -1,15 |
| PEBP1        | -1,16 |
| SERPINE2     | -1,16 |
| ZNF407       | -1,16 |

|              |       |
|--------------|-------|
| NRIP1        | -1,16 |
| TMEM39A      | -1,16 |
| MARK1        | -1,16 |
| LDOC1        | -1,16 |
| HELZ         | -1,16 |
| ZNF318       | -1,16 |
| CPSF6        | -1,17 |
| TAS2R46      | -1,17 |
| FAM18B1      | -1,17 |
| MED28        | -1,17 |
| LOC100289627 | -1,17 |
| PHKB         | -1,17 |
| TBC1D4       | -1,17 |
| DYNC2L1      | -1,18 |
| JAM2         | -1,18 |
| FAM216B      | -1,18 |
| F8           | -1,18 |
| PPWD1        | -1,18 |
| PCTP         | -1,18 |
| PDXDC2P      | -1,18 |
| WNK3         | -1,18 |
| SPATA7       | -1,18 |
| BCYRN1       | -1,18 |
| STK33        | -1,19 |
| PAPD4        | -1,19 |
| HERC2P3      | -1,19 |
| GMFB         | -1,19 |
| SMAD4        | -1,19 |
| PPIAP21      | -1,19 |
| SEL1L        | -1,19 |
| SNHG5        | -1,19 |
| EPS15        | -1,19 |
| MBOAT1       | -1,19 |
| NDFIP1       | -1,19 |
| CYTH2        | -1,19 |
| RSPH1        | -1,19 |
| FBXW8        | -1,19 |
| PURA         | -1,19 |
| ZNF264       | -1,2  |
| ABI2         | -1,2  |
| LOC100507547 | -1,2  |
| CLCN3        | -1,2  |
| ZNF493       | -1,2  |
| PPP2R5C      | -1,2  |
| GLG1         | -1,2  |
| PCYOX1L      | -1,2  |
| CYSTM1       | -1,2  |
| RPL7         | -1,2  |
| RAP1GAP2     | -1,2  |
| UTP20        | -1,2  |
| SCGB1D2      | -1,2  |
| DOK6         | -1,21 |
| METTL21B     | -1,21 |
| IFT81        | -1,21 |
| C18orf25     | -1,21 |
| ANK2         | -1,21 |
| KCTD12       | -1,21 |
| APH1B        | -1,21 |
| ZNF681       | -1,21 |
| RBM26        | -1,21 |
| UBFD1        | -1,21 |
| ERO1LB       | -1,21 |
| ZZZ3         | -1,22 |
| ABHD10       | -1,22 |
| PWRN2        | -1,22 |
| GSTA3        | -1,22 |
| SNX18        | -1,22 |
| C14orf135    | -1,22 |
| RPS26        | -1,22 |
| KLC1         | -1,22 |
| N4BP2L1      | -1,22 |
| LUC7L3       | -1,22 |
| ROBO2        | -1,22 |
| PTCD3        | -1,23 |
| NOTCH2NL     | -1,23 |
| MUC16        | -1,23 |
| GOLGA6L5     | -1,24 |
| RASA1        | -1,24 |
| AHCYL1       | -1,24 |
| WDR19        | -1,24 |
| RMST         | -1,24 |
| TBP          | -1,24 |
| CD302        | -1,24 |
| KLF11        | -1,24 |
| DHX40        | -1,24 |
| SHISA2       | -1,24 |
| PHEX         | -1,25 |
| ADGB         | -1,25 |
| XPNPEP3      | -1,25 |
| LONRF2       | -1,25 |
| ESCO1        | -1,25 |
| STAG2        | -1,25 |
| SHROOM3      | -1,25 |
| NEXN         | -1,25 |
| N4BP2L2      | -1,26 |
| RBM15        | -1,26 |

|          |       |
|----------|-------|
| Feb 03   | -1,26 |
| GDNF     | -1,26 |
| LRIG2    | -1,26 |
| RBPJ     | -1,26 |
| TAS2R50  | -1,26 |
| RASA1    | -1,26 |
| CDKN2AIP | -1,26 |
| TCTN2    | -1,26 |
| ACSS3    | -1,26 |
| SLC25A27 | -1,26 |
| RBM24    | -1,26 |
| RUFY3    | -1,27 |
| FAM98A   | -1,27 |
| TERF2IP  | -1,28 |
| TH1L     | -1,28 |
| DCAF16   | -1,28 |
| IPW      | -1,28 |
| EGLN3    | -1,28 |
| HDHD2    | -1,28 |
| ARMCX4   | -1,28 |
| ZNF84    | -1,29 |
| NDEL1    | -1,29 |
| NAP1L2   | -1,29 |
| GNAS     | -1,29 |
| KIF5C    | -1,29 |
| PNRC2    | -1,29 |
| RAN      | -1,3  |
| WDR77    | -1,3  |
| FAM227A  | -1,3  |
| EPB41L2  | -1,3  |
| APOOL    | -1,3  |
| DNAH12   | -1,3  |
| SCN7A    | -1,3  |
| RAD52    | -1,3  |
| SYNPQ2   | -1,3  |
| CCDC11   | -1,31 |
| MEIS3P1  | -1,31 |
| GMNC     | -1,31 |
| PTGS2    | -1,31 |
| FAM120C  | -1,31 |
| ATP1A1   | -1,32 |
| REFL     | -1,32 |
| ZNF776   | -1,32 |
| WNT5A    | -1,32 |
| SERPINE2 | -1,32 |
| C5orf43  | -1,32 |
| VPS53    | -1,33 |
| GPATCH8  | -1,33 |
| SCD5     | -1,33 |
| NOTCH2   | -1,33 |
| RLIM     | -1,33 |
| FZD7     | -1,33 |
| TMEM184C | -1,34 |
| DNAL1    | -1,34 |
| RPRD1B   | -1,34 |
| KCTD12   | -1,34 |
| SRSF3    | -1,34 |
| CRYZ     | -1,34 |
| PGM1     | -1,34 |
| OR7E47P  | -1,34 |
| PPM1K    | -1,35 |
| MBLAC2   | -1,35 |
| SPRYD7   | -1,35 |
| C16orf52 | -1,35 |
| HDHD2    | -1,35 |
| MBNL2    | -1,35 |
| CHRFAM7A | -1,35 |
| TCEAL2   | -1,35 |
| GREB1    | -1,36 |
| THUMPD1  | -1,36 |
| C17orf57 | -1,36 |
| CSRNP3   | -1,36 |
| AMY2B    | -1,36 |
| NLE1     | -1,37 |
| SNX1     | -1,37 |
| GUSBP4   | -1,37 |
| C16orf80 | -1,37 |
| C12orf51 | -1,37 |
| MRPL40   | -1,37 |
| MSI2     | -1,37 |
| ATP9A    | -1,37 |
| ZMAT1    | -1,38 |
| ZNF711   | -1,38 |
| ANAPC4   | -1,38 |
| TDGF1P3  | -1,38 |
| NOB1     | -1,38 |
| SPATA17  | -1,38 |
| RBMS1    | -1,38 |
| NAP1L3   | -1,38 |
| RPRM     | -1,38 |
| DNAAF1   | -1,39 |
| PHKB     | -1,39 |
| TM4SF19  | -1,39 |
| TTC3     | -1,4  |
| FAM13A   | -1,4  |
| LAMB3    | -1,4  |

|              |       |
|--------------|-------|
| RPS8         | -1,4  |
| RUNDC1       | -1,4  |
| TPP2         | -1,41 |
| BAZ2B        | -1,41 |
| ANK2         | -1,41 |
| MTHFSD       | -1,41 |
| WDR96        | -1,41 |
| EPB41L2      | -1,41 |
| CPD          | -1,41 |
| CCDC144B     | -1,41 |
| PIAS2        | -1,42 |
| RBMX2        | -1,42 |
| TMEM170A     | -1,42 |
| SERPINB8     | -1,43 |
| CCNB1        | -1,43 |
| BEX5         | -1,44 |
| ACTR5        | -1,44 |
| LRRC49       | -1,44 |
| FAM82A2      | -1,44 |
| ARSG         | -1,44 |
| LOC100272228 | -1,45 |
| C12orf35     | -1,46 |
| UBXN8        | -1,46 |
| LPGAT1       | -1,46 |
| ASXL3        | -1,46 |
| HOXD4        | -1,46 |
| PPM1L        | -1,46 |
| MLH3         | -1,47 |
| UBE2I        | -1,47 |
| LOC100507308 | -1,48 |
| SLC40A1      | -1,48 |
| ECHDC2       | -1,48 |
| ID4          | -1,49 |
| PHACTR3      | -1,49 |
| NAV3         | -1,49 |
| DZIP3        | -1,5  |
| GMNC         | -1,5  |
| SYTL4        | -1,5  |
| ARMCX4       | -1,5  |
| PCDHB5       | -1,5  |
| FLRT2        | -1,5  |
| HSDL1        | -1,51 |
| PROM1        | -1,51 |
| GOSR1        | -1,52 |
| BICD1        | -1,52 |
| PGGT1B       | -1,52 |
| ZNF75D       | -1,52 |
| ARHGAP29     | -1,52 |
| SNAP91       | -1,52 |
| CEP70        | -1,53 |
| ZNF385B      | -1,53 |
| WHAMM        | -1,53 |
| HAUS3        | -1,53 |
| ZFX          | -1,53 |
| PCMTD2       | -1,53 |
| EIF3C        | -1,53 |
| C1orf63      | -1,54 |
| DMD          | -1,54 |
| RPL15        | -1,55 |
| SCAMP1       | -1,55 |
| ZFAND6       | -1,55 |
| TRPC1        | -1,55 |
| SLC40A1      | -1,55 |
| UNC80        | -1,55 |
| CILP         | -1,55 |
| MEG3         | -1,56 |
| FAT1         | -1,56 |
| PWRN2        | -1,57 |
| CLCN3        | -1,57 |
| RORA         | -1,57 |
| RASGRF2      | -1,58 |
| SDK2         | -1,59 |
| PLCXD3       | -1,59 |
| WASF3        | -1,59 |
| CYP4V2       | -1,6  |
| ZNF204P      | -1,6  |
| LUC7L        | -1,61 |
| C3orf15      | -1,61 |
| LOC100506965 | -1,62 |
| MBD1         | -1,62 |
| MRPL10       | -1,63 |
| NOTCH2NL     | -1,63 |
| SLC5A3       | -1,63 |
| MTX3         | -1,63 |
| RPRD1B       | -1,64 |
| TMEM97       | -1,64 |
| PAPD4        | -1,65 |
| ZNF177       | -1,65 |
| PIK3C3       | -1,65 |
| EDA2R        | -1,66 |
| BCL2         | -1,66 |
| TXNDC16      | -1,66 |
| ATXN1        | -1,67 |
| SERPINE2     | -1,68 |
| FOXO1        | -1,68 |
| EDIL3        | -1,68 |



|              |       |
|--------------|-------|
| GRAMD3       | -1,69 |
| MYLK3        | -1,69 |
| ZXDC         | -1,69 |
| DSEL         | -1,69 |
| NLGN4X       | -1,69 |
| SP1          | -1,7  |
| TMEM170A     | -1,7  |
| KAT2B        | -1,7  |
| FAM172A      | -1,71 |
| NOL9         | -1,71 |
| WNT5A        | -1,72 |
| ARRDC4       | -1,72 |
| PEG3         | -1,72 |
| OGT          | -1,73 |
| CHRFAM7A     | -1,73 |
| ACSM4        | -1,74 |
| ZMAT1        | -1,74 |
| SLC40A1      | -1,76 |
| NME5         | -1,76 |
| ID4          | -1,77 |
| PEG3         | -1,78 |
| PRNP         | -1,78 |
| GMNC         | -1,78 |
| ZMAT1        | -1,79 |
| TAPT1        | -1,8  |
| GPRASP1      | -1,8  |
| PEG3         | -1,81 |
| FLG-AS1      | -1,82 |
| ZNF207       | -1,83 |
| RSPH1        | -1,84 |
| COPS8        | -1,85 |
| STX2         | -1,87 |
| PEG3         | -1,88 |
| TCF21        | -1,88 |
| TMEM161B-AS  | -1,89 |
| ATRNL1       | -1,89 |
| EP400        | -1,9  |
| GATM         | -1,91 |
| C1orf168     | -1,92 |
| TMBIM4       | -1,93 |
| MBTPS1       | -1,93 |
| AKAP10       | -1,93 |
| FTX          | -1,94 |
| TSPAN8       | -1,94 |
| PLCXD3       | -1,97 |
| PEG3         | -1,97 |
| LOC100506948 | -1,99 |
| MEG3         | -2    |
| BICD1        | -2,01 |
| OVGP1        | -2,03 |
| NLK          | -2,03 |
| SPRR2F       | -2,1  |
| BIVM         | -2,11 |
| AR           | -2,12 |
| F8           | -2,14 |
| MST1P9       | -2,14 |
| PHEX         | -2,15 |
| CD22         | -2,17 |
| TSHZ1        | -2,2  |
| LOC284244    | -2,23 |
| BRWD3        | -2,25 |
| C1orf173     | -2,26 |
| SNORD116@    | -2,31 |
| LOC100506948 | -2,42 |
| RPL37        | -2,54 |
| MLXIP        | -2,61 |
| TPRG1        | -2,75 |
| TSPAN5       | -2,76 |
