# Supplementary material for: Discovery and Validation of Novel Biomarkers for Detection of Epithelial Ovarian Cancer
Source: MDPI journal article supplement (doi:10.3390/cells8070713), 2019-07-12
Supplement: s1 [file s1]

**Table S4A:** Tissue based results are shown

| Model       | Full | VCAN | NR2F6 | MELK | ISG15 | MMP15 | CLDN6 | DTL | MAL | CFB | AURKA | BMP7 | FUT2 | FGF18 | Average |
|-------------|------|------|-------|------|-------|-------|-------|-----|-----|-----|-------|------|------|-------|---------|
| TP          | 23   | 14   | 21    | 20   | 20    | 21    | 22    | 21  | 20  | 21  | 20    | 18   | 20   | 19    | 20,25   |
| FP          |      | 9    | 2     | 3    | 3     | 2     | 1     | 2   | 3   | 2   | 3     | 5    | 3    | 4     | 2,75    |
| Sensitivity | 100  | 82   | 91    | 100  | 82    | 100   | 100   | 100 | 73  | 91  | 82    | 64   | 82   | 91    | 88      |
| Specificity | 100  | 42   | 92    | 75   | 92    | 83    | 92    | 83  | 100 | 92  | 92    | 92   | 92   | 75    | 88      |
| PPV         | 100  | 56   | 91    | 79   | 90    | 85    | 92    | 85  | 100 | 91  | 90    | 88   | 90   | 77    | 88      |

The prediction performance of the twelve tissue nanostring validated biomarker candidates, a model based on all twelve and the average performance of the twelve markers along with VCAN is shown. Sensitivity ranged from 20 to 90% with an average of 68% while specificity ranged from 30% to 100% with average of 58%. The PPV ranged from 53% to 100% and averaged at 66%. Malignant has been set as default class i.e. had to be predicted and a sensitivity of 50% states that 50% of all malignant samples have been correctly identified

**Table S4B:** Blood based results are shown

| Model       | Full | VCAN | NR2F6 | MELK | ISG15 | MMP15 | CLDN6 | DTL | MAL | CFB | AURKA | BMP7 | FUT2 | FGF18 | Average |
|-------------|------|------|-------|------|-------|-------|-------|-----|-----|-----|-------|------|------|-------|---------|
| TP          | 18   | 14   | 14    | 14   | 14    | 13    | 13    | 13  | 12  | 12  | 12    | 11   | 11   | 11    | 12,5    |
| FP          | 4    | 6    | 6     | 6    | 6     | 7     | 7     | 7   | 8   | 8   | 8     | 9    | 9    | 9     | 7,5     |
| Sensitivity | 90   | 60   | 90    | 70   | 80    | 60    | 40    | 70  | 80  | 90  | 20    | 50   | 90   | 70    | 68      |
| Specificity | 70   | 80   | 50    | 70   | 60    | 70    | 90    | 60  | 40  | 30  | 100   | 60   | 20   | 40    | 58      |
| PPV         | 75   | 75   | 64    | 70   | 67    | 67    | 80    | 64  | 57  | 56  | 100   | 56   | 53   | 54    | 66      |

The prediction performance of the twelve blood nanostring validated biomarker candidates, a model based on all twelve and the average performance of the twelve markers along with VCAN is shown. Sensitivity ranged from 20 to 90% with an average of 68% while specificity ranged from 30% to 100% with average of 58%. The PPV ranged from 53% to 100% and averaged at 66%

**Legend**  
TP = True Positives  
FP = False Positives  
Sensitivity = True Positive Rate  
Specificity = True Negative Rate  
PPV = Positive Predictive Value
