# Supplementary material for: Discovery and Validation of Novel Biomarkers for Detection of Epithelial Ovarian Cancer
Source: MDPI journal article supplement (doi:10.3390/cells8070713), 2019-07-12
Supplement: s1 [file s1]

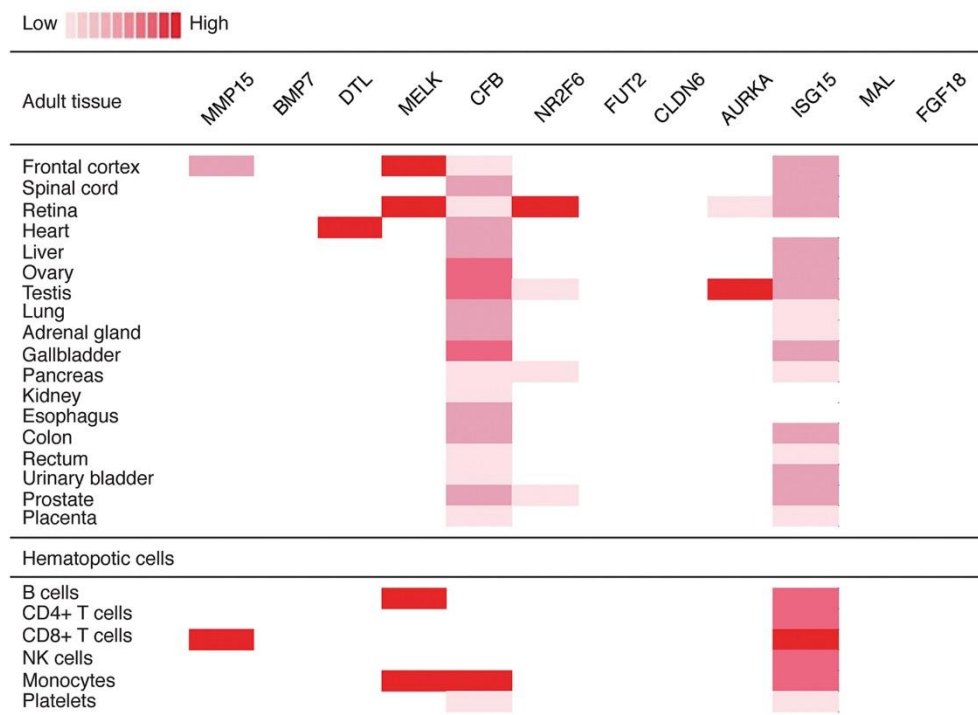

**Supplementary Figure S4. Normal protein expression levels of biomarker candidates in tissue from healthy donors.**
