# Supplementary material for: Discovery and Validation of Novel Biomarkers for Detection of Epithelial Ovarian Cancer
Source: MDPI journal article supplement (doi:10.3390/cells8070713), 2019-07-12
Supplement: s1 [file s1]

**Table S3.** 152 gene signature

| <b>HGNC_symb</b> | <b>logFC</b> | <b>fold change</b> |
|------------------|--------------|--------------------|
| <u>EFEMP1</u>    | 3,36         | 10,27              |
| <u>SLIT2</u>     | 3,28         | 9,71               |
| <u>RGS2</u>      | 3,01         | 8,06               |
| <u>DTL</u>       | 2,92         | 7,57               |
| <u>CD53</u>      | 2,86         | 7,26               |
| <u>MMP15</u>     | 2,69         | 6,45               |
| <u>ICMT</u>      | 2,52         | 5,74               |
| <u>SPP1</u>      | 2,5          | 5,66               |
| <u>AURKA</u>     | 2,46         | 5,50               |
| <u>PLEK</u>      | 2,35         | 5,10               |
| <u>ZDHHC14</u>   | 2,29         | 4,89               |
| <u>ITGA4</u>     | 2,21         | 4,63               |
| <u>ISG15</u>     | 2,2          | 4,59               |
| <u>CFB</u>       | 2,15         | 4,44               |
| <u>RAPH1</u>     | 2,11         | 4,32               |
| <u>S100A8</u>    | 2,07         | 4,20               |
| <u>NANP</u>      | 2,01         | 4,03               |
| <u>OAS2</u>      | 1,98         | 3,94               |
| <u>VCAN</u>      | 1,93         | 3,81               |
| <u>CLDN6</u>     | 1,86         | 3,63               |
| <u>LRP2</u>      | 1,86         | 3,63               |
| <u>NPC2</u>      | 1,85         | 3,61               |
| <u>RALBP1</u>    | 1,81         | 3,51               |
| <u>CHCHD3</u>    | 1,8          | 3,48               |
| <u>ARL4C</u>     | 1,76         | 3,39               |
| <u>TINAGL1</u>   | 1,75         | 3,36               |
| <u>LMF2</u>      | 1,74         | 3,34               |
| <u>FGF9</u>      | 1,72         | 3,29               |
| <u>UTRN</u>      | 1,72         | 3,29               |
| <u>FGF18</u>     | 1,7          | 3,25               |
| <u>BMP7</u>      | 1,69         | 3,23               |
| <u>RGS5</u>      | 1,65         | 3,14               |
| <u>OLFML2B</u>   | 1,58         | 2,99               |
| <u>THBD</u>      | 1,58         | 2,99               |
| <u>TNFSF10</u>   | 1,58         | 2,99               |
| <u>FUT2</u>      | 1,56         | 2,95               |
| <u>CLIC4</u>     | 1,54         | 2,91               |
| <u>SPRY1</u>     | 1,54         | 2,91               |
| <u>KDM5C</u>     | 1,53         | 2,89               |
| <u>CALR</u>      | 1,52         | 2,87               |
| <u>SDC3</u>      | 1,52         | 2,87               |
| <u>UBE2D3</u>    | 1,51         | 2,85               |
| <u>IFITM1</u>    | 1,49         | 2,81               |
| <u>ADAMTSL5</u>  | 1,48         | 2,79               |
| <u>NOTCH3</u>    | 1,47         | 2,77               |
| <u>PTP4A2</u>    | 1,47         | 2,77               |
| <u>RIT1</u>      | 1,46         | 2,75               |

|                 |      |      |
|-----------------|------|------|
| <u>MELK</u>     | 1,45 | 2,73 |
| <u>CCT3</u>     | 1,44 | 2,71 |
| <u>CXCL17</u>   | 1,44 | 2,71 |
| <u>EMB</u>      | 1,44 | 2,71 |
| <u>CFI</u>      | 1,43 | 2,69 |
| <u>RHBDL2</u>   | 1,43 | 2,69 |
| <u>ZFYVE16</u>  | 1,41 | 2,66 |
| <u>APOC1</u>    | 1,4  | 2,64 |
| <u>LUM</u>      | 1,39 | 2,62 |
| <u>NFKBIA</u>   | 1,38 | 2,60 |
| <u>LYZ</u>      | 1,37 | 2,58 |
| <u>CSH1</u>     | 1,36 | 2,57 |
| <u>LCP1</u>     | 1,36 | 2,57 |
| <u>SLC44A3</u>  | 1,36 | 2,57 |
| <u>APLP1</u>    | 1,34 | 2,53 |
| <u>FCER1G</u>   | 1,34 | 2,53 |
| <u>DSE</u>      | 1,33 | 2,51 |
| <u>IFI27</u>    | 1,32 | 2,50 |
| <u>LDLR</u>     | 1,31 | 2,48 |
| <u>GNAO1</u>    | 1,3  | 2,46 |
| <u>TOR1AIP2</u> | 1,29 | 2,45 |
| <u>NQO1</u>     | 1,28 | 2,43 |
| <u>RAB13</u>    | 1,28 | 2,43 |
| <u>SNX5</u>     | 1,27 | 2,41 |
| <u>CDCP1</u>    | 1,25 | 2,38 |
| <u>PVRL4</u>    | 1,25 | 2,38 |
| <u>SLC6A8</u>   | 1,25 | 2,38 |
| <u>GPRC5A</u>   | 1,24 | 2,36 |
| <u>IL17D</u>    | 1,24 | 2,36 |
| <u>MAL</u>      | 1,24 | 2,36 |
| <u>RNPEP</u>    | 1,24 | 2,36 |
| <u>CRIPAK</u>   | 1,23 | 2,35 |
| <u>RGS1</u>     | 1,22 | 2,33 |
| <u>CAMK1G</u>   | 1,22 | 2,33 |
| <u>COL3A1</u>   | 1,21 | 2,31 |
| <u>PIM1</u>     | 1,21 | 2,31 |
| <u>BME</u>      | 1,21 | 2,31 |
| <u>C1orf116</u> | 1,2  | 2,30 |
| <u>C6orf106</u> | 1,2  | 2,30 |
| <u>MARK3</u>    | 1,2  | 2,30 |
| <u>PRRX1</u>    | 1,2  | 2,30 |
| <u>CTGF</u>     | 1,2  | 2,30 |
| <u>FN1</u>      | 1,19 | 2,28 |
| <u>SCD</u>      | 1,19 | 2,28 |
| <u>FUCA2</u>    | 1,19 | 2,28 |
| <u>LAPTM5</u>   | 1,18 | 2,27 |
| <u>LRRC41</u>   | 1,17 | 2,25 |
| <u>VKORC1L1</u> | 1,17 | 2,25 |
| <u>CYP1B1</u>   | 1,17 | 2,25 |
| <u>COL5A2</u>   | 1,16 | 2,23 |

|                 |      |      |
|-----------------|------|------|
| <u>COL6A3</u>   | 1,15 | 2,22 |
| <u>BCL2L1</u>   | 1,15 | 2,22 |
| <u>GPRC5B</u>   | 1,14 | 2,20 |
| <u>IFIH1</u>    | 1,14 | 2,20 |
| <u>RHOU</u>     | 1,14 | 2,20 |
| <u>SNX18</u>    | 1,14 | 2,20 |
| <u>ATP1B1</u>   | 1,14 | 2,20 |
| <u>FAM129A</u>  | 1,13 | 2,19 |
| <u>STXBP6</u>   | 1,13 | 2,19 |
| <u>TIGIT</u>    | 1,13 | 2,19 |
| <u>PDLIM5</u>   | 1,13 | 2,19 |
| <u>SFRP2</u>    | 1,12 | 2,17 |
| <u>THBS1</u>    | 1,12 | 2,17 |
| <u>FURIN</u>    | 1,12 | 2,17 |
| <u>IL1R1</u>    | 1,11 | 2,16 |
| <u>LGALS1</u>   | 1,11 | 2,16 |
| <u>PVRL3</u>    | 1,11 | 2,16 |
| <u>FGF7</u>     | 1,11 | 2,16 |
| <u>IL1RAP</u>   | 1,1  | 2,14 |
| <u>SEMA4C</u>   | 1,09 | 2,13 |
| <u>TAGLN</u>    | 1,09 | 2,13 |
| <u>PRIMA1</u>   | 1,09 | 2,13 |
| <u>AP2M1</u>    | 1,08 | 2,11 |
| <u>ARL6IP5</u>  | 1,07 | 2,10 |
| <u>CCBP2</u>    | 1,07 | 2,10 |
| <u>PIGA</u>     | 1,07 | 2,10 |
| <u>SLCO4A1</u>  | 1,07 | 2,10 |
| <u>SNX9</u>     | 1,07 | 2,10 |
| <u>ZDHHC9</u>   | 1,07 | 2,10 |
| <u>ATP6V0A2</u> | 1,07 | 2,10 |
| <u>CXCL3</u>    | 1,06 | 2,08 |
| <u>FKBP8</u>    | 1,06 | 2,08 |
| <u>MAN1A1</u>   | 1,06 | 2,08 |
| <u>RPN2</u>     | 1,06 | 2,08 |
| <u>UNC5C</u>    | 1,06 | 2,08 |
| <u>WDR5B</u>    | 1,06 | 2,08 |
| <u>CAMK2D</u>   | 1,06 | 2,08 |
| <u>RALY</u>     | 1,05 | 2,07 |
| <u>FAM174B</u>  | 1,05 | 2,07 |
| <u>KIAA1919</u> | 1,04 | 2,06 |
| <u>SLC17A7</u>  | 1,04 | 2,06 |
| <u>CDC42EP4</u> | 1,04 | 2,06 |
| <u>NR2F6</u>    | 1,03 | 2,04 |
| <u>RAB3D</u>    | 1,03 | 2,04 |
| <u>BMPR2</u>    | 1,03 | 2,04 |
| <u>DSC3</u>     | 1,02 | 2,03 |
| <u>EMP1</u>     | 1,02 | 2,03 |
| <u>ERC1</u>     | 1,02 | 2,03 |
| <u>HIST1H4L</u> | 1,02 | 2,03 |
| <u>IL1RN</u>    | 1,02 | 2,03 |

|                 |      |      |
|-----------------|------|------|
| <u>APOLD1</u>   | 1,02 | 2,03 |
| <u>RNF19A</u>   | 1,01 | 2,01 |
| <u>CCDC109B</u> | 1,01 | 2,01 |
| <u>KIRREL</u>   | 1    | 2,00 |
| <u>TAGLN2</u>   | 1    | 2,00 |
|                 |      |      |
