# Supplementary material for: Discovery and Validation of Novel Biomarkers for Detection of Epithelial Ovarian Cancer
Source: MDPI journal article supplement (doi:10.3390/cells8070713), 2019-07-12
Supplement: s1 [file s1]

Table S1. List of custom probes designed by Nanostring

| Gene     | Target sequence                                                                         |
|----------|-----------------------------------------------------------------------------------------|
| B2M      | CACGGAGCGAGACATCTCGGCCGAATGCTGTGACGCTTCTCAAGACCTAAGCGACAGCGTGACCTTGTTTCA                |
| EFEMP1   | TGACTTCACGAGCACAAAGCATTGCACTTACAGGACTGTTTGTCTGAGGTCTCCTCTTCTTTCTTGGTGTGAGAAAGTGCTC      |
| SLIT2    | AACCTGTGACATCTCTTGGAAATACCTTTCCGCAAGACCTTCAAACCTTCACAATTCTGCGGGTTAGCAGGAAGGTTAGGGAAAC   |
| RGS1     | TCTGTTAATTCCTTCAGCCAGGGACCACTGACTTATAGCTTATAGCTGTGTTGAGATTATTGAGCTTCATCATGACCAGAAG      |
| DTL      | ACTTAGAAAAGGCAACTGACTTGAGGCTGCATTGATGACCTTTGCATGTTCAAAGACGCCTATCTTCCAGTTTGATCGGGAAACT   |
| CD53     | GGTTTTGCATTTCCGGAGATGAAACAAGTCTCTTCCACACAGGACTACTGCGAACCTAACTCCTCGCTACATTCTCATTTGTTTTTC |
| MMP15    | ACAAAACGACCGTCTTGCGCTCGTAGGCGCACTGATGTACCGGCCAATTGGTTTTACTCCCTCGATTATGCGGAGT            |
| ICMT     | AACCAAGCGTACACTCCACTGGTCACCAGAGATGTGTATCTGATTTTCTTTCGGGTTATATCTATCATTTACTTGACACCCT      |
| SPP1     | CTGACTCGTTTCATAACTGTCTCTCCACGGCTGTCCCAATCAGAAGGCGCAACAGCCACTTTTTCCAAATTTTGCAAGAGCC      |
| AURKA    | AAGGAAATTGCTGAGTCACGAGAACGCTTTTGGACCTCCAACCTGGAGCTCACCGTGTGGACGGCAACTCAGAGATAACGCATAT   |
| PLEK     | GAGCTGCTGCTACTTGTGCTTAAAGCTGAGGCACGAAACGAATATCATTTCTGGAGTTTATGTATTGCCAACGAGTTTGTCTTT    |
| APOLD1   | CCCTAATGGGCTTTTAGTGTTACATCCCTTGTTCATACGGTGAGACACTGCAGATAAGGTTGTTATTGTGGAGGATGTTACTACA   |
| ITGA4    | TGCCCCGGGATTGATCACTGAAGCGTTGGCGAGCCAGTTGCTTCTTCTGTGTTCAGCTACAAACTTAGAAAC                |
| ISG15    | CTCAGAGGTCGTGCGATTGTCCACCACCAGCAGGACCATAAAATTTGGTTTTGCCTTTCAGCAATTCAACTT                |
| GAPDH    | AAGTGGTCGTTGAGGGCAATGCCAGCCCCAGCGTCAAAGCTGGTCAAGACTTGCATGAGGACCCGCAAAATTCCT             |
| CFB      | CGGTGCAGGGGAGACAAATGGGCTGTATGCTGGCCATATTTACGCTTACTTTTCTGGGACGCTTGAAGCGCAAGTAGAAAAAC     |
| RAPH1    | GATAATCCTTTCAAGGTGCCATGTTTCAATGTATGTCCGGCTAACAGGCAACAGCAGACCTGCAATATCAAAGTTATAAGCGCGT   |
| S100A8   | AATTTCTTCAGGTCACTCCTGTAGACGGCATGGAATTTCCCTTTATCAGCCTGCCAATGCACTCGATCTGTCAATTTTTGCG      |
| NANP     | CCTGTGGGAGAGTTAAAGGACAAGCCCCCTGCAGCACAGCCAAACAACTGGAGAGAGAAGTGAAGACGATTAAACCCA          |
| OAS2     | CTGGATGGTGAACCCATCAAGGGACTTCTGGATCTCGAAATGTTTTTACGATTGCTGCATTCCGCTCAACGCTTGAGGAAGTA     |
| VCAN     | CAAAATTTGTTCTTCTGTGAGACAGGATGCTGTGAGATGGGCACCTGCCTGAGGCTGTAAAGCTGTAGCAACTCTTCCACGA      |
| CLDN6    | CTCTTTGGCTCCATCATCCAAGGGTGAGAAACAGCAGAGCCTAAGCTAGGACGCAATATCACTTGAAGAAGTGAAAGCGAG       |
| LRP2     | AGCACCAAACTAGAGCCCTCCCTCGCACAGTGTAAATACACAACCCACGCGATGACGTTCTGCTCAAGAGTCGCATAATCT       |
| NPC2     | GTTGGGTGGGGCATGGGCTCACATTCATCTTTATAACTCCATCCACACATTTGGAATGATGTGTACTGGGAATAAGACGACG      |
| RALBP1   | TCATTTTGAAGGATTTCTGGCTCATCTTCCAGAGCTATCTTCTGAAAGCACAGAATCCTCTGACTGTGAAGGAGGGTCAAAC      |
| NR2F6    | TACGTGTCCAGAGGATCTGCCTGGCACGCTAGCTACCTTGACGTAGATTGTATCAGGTTACGATGACTGC                  |
| ARL4C    | CCACACACACACACCCCATCCAGCATTACACCAAAAGCCTTACCCTTCTTACAGATCGTGTGCTCATGACTTCCACAGACGT      |
| TINAGL1  | ATCTCCTTGTGCTGGAGCCGAGGCGGTAGACAGGCTTGGAGGAGTTGATAGTGGTAAAAACAACATTAGC                  |
| LMF2     | CCCACAAGGGACAGTTGGACTACAGCACTGAGCTTCCGTAGCCTACGTATATATCCAAGTGGTTATGTCCGACGGC            |
| FGF9     | CCCATCCAAGCCTCCATCATACATTATGTCATGCGACAAGTTTGGCAACACAGCAAGAAGGAGTATGGAACCTTATAGCAAGAGAG  |
| UTRN     | AACCTGGAGGTTGGCATCATCCAGCTCAGATACTAAACGCTTCACAATTTACCCCTCCAAACGCATTCTTATTGGCAATGGAA     |
| FGF18    | ATCGGGCTTCCCAACGAGCTTGCTTTTGGCGTTTCATGCACAGGTAGAATTTCCGAAAGCAATCTGTCGCTCACTCTGTATGTCCTG |
| BMP7     | GTAGCGTGGGTGGAAGAATTCTTGTCTGTTCCACGAGGTTGACGAAGCCCGGGAATCGGCATTTCGATTCTTAGGATCTAAA      |
| GPRC5B   | AGTGGTGATCACTTTCCAATGTGATGGTCATCTATCACCCAGAGGGCCGATCTTATAACGGAACAACTGAACGGGCCATT        |
| THBD     | TGGCACTGGTACTCGCAGTTGGCTCTGAAGCACGGCGCTATGCAGACGAGCTGGCAGAGGAGAGAAATCA                  |
| TNFSF10  | CTGTGAAGATCACGATCAGCACGCAAGTCTGTCCCCATTGCAACCATGTGAAGTAATGTGAGCGTACTT                   |
| FUT2     | GAAGAGGCAGGACCTATGGACTTGGATGTCATGCCAGCTACAAGCCAATATCACCAAGTTAGCGTGGCGTATACCATGTTGTTAAAC |
| CLIC4    | TGAGAAAACCTCACTCCCTCTAAACTTTTAGCTTCTACATGGTGTGACACCTGAATCAATAGAACAATATCAGTTATGGCGGTG    |
| SPRY1    | TGAACCTGTGCTGTGTCAGGCTCTTTTCAAGGAACCTTCAAGTCAATCCCGTTTGAATATGACAGGCCGCTAAAGACGTTCT      |
| PRIMA1   | TCCAGTACACGCGGCACGTTGCTAAGAAGGCAGATTTCAGGATATTACACCGTCTCAGATGAGTGGGTTAATCAATCAAGTATG    |
| CALR     | AGGCCACGACGCAAAAGTTATCATAGGCATAGATACTGGGATCGGCTGACACATTAGTAACGTCGGCAAGCACTTAGTCG        |
| SDC3     | AGAGGAGAGATTCAACAACCCAGAGAGACAGGACAAAACAGGCTGGTGGCTGAACCAAGATTATGTATGGACGCGCAATAGATA    |
| SLC6A8   | AGAAGGTTCCATTGCTGGCTGGCTCTCTAAGCTTCTATAACAGGGCATACGAAATTTGAGCAAGCAATTGAAGGCTTAGA        |
| IFITM1   | TCTGTAACATAATATGGTAGACTGTACAGAGCCGAATACCAAGTAACAGGCTATCAGCTAATAGGGTCGGCTCAACAGTGATCC    |
| ADAMTSL5 | ATCAGGTAAGAAGACAGGAGAGCTGGAGCCCGGTATGGAGAGGAAGAACCTATCAATTCGTGACCCCGATCATCCAGTCCAGAA    |
| MAL      | ACAGCAGTTGGAGGTTAGACACAGCAAGCTCCCAACCCGACGCGAAGCTTGAGCTCTAGGCCAAAACGACCTTAATGGTCA       |
| PTP4A2   | ACTGAACACAGCAATGCCATTGGTATCTCTGAAGCGTAATCGCATCTTACTAGCCAGATCCTACGAGATGAGCTACGTAACCTA    |
| MELK     | GAATGCTACTGGGAGAGAGCCATTGGGAACATCATATTTCTCTCATACAAATGCACCTATATGAGGGGAGAGTAGCTGGAT       |
