# Supplementary material for: Discovery and Validation of Novel Biomarkers for Detection of Epithelial Ovarian Cancer
Source: MDPI journal article supplement (doi:10.3390/cells8070713), 2019-07-12
Supplement: s1 [file s1]

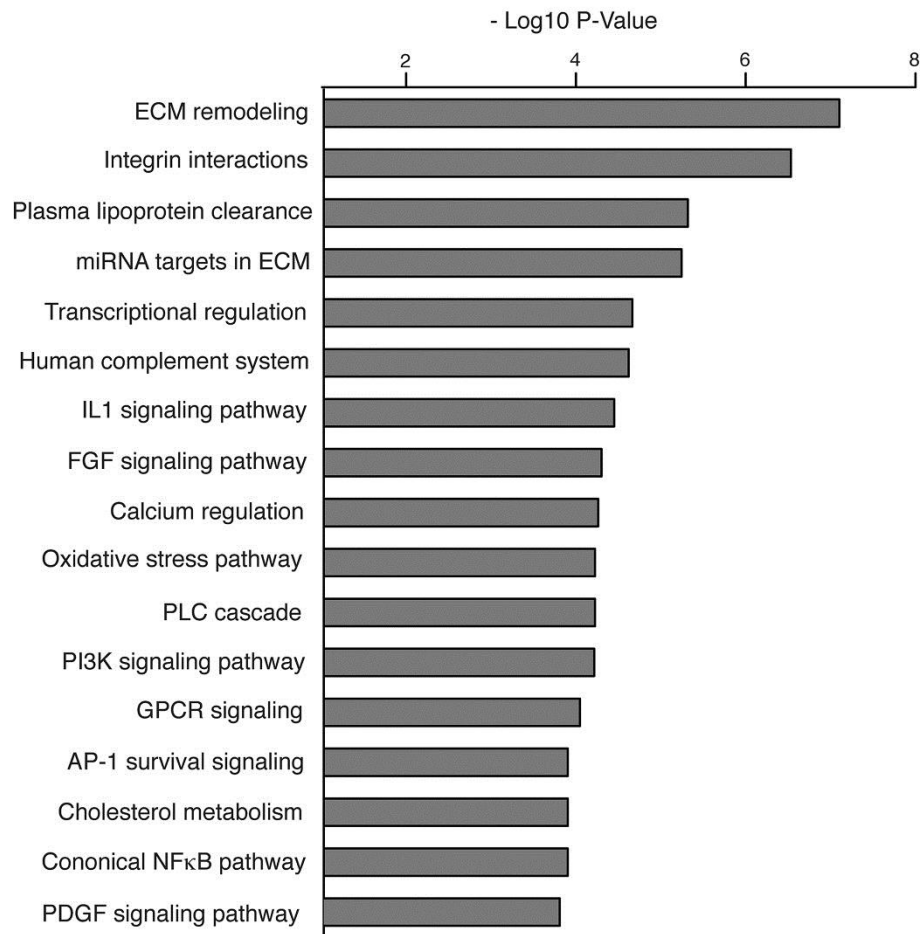

**Supplementary Figure S1: Gene-set over-representation analysis of candidate biomarkers.**

The biological processes that the 152 candidates were associated with were uncovered by gene-set over-representation analysis (GSOA) using the ConsensusPath database (<http://cpdb.molgen.mpg.de>). The 17 significantly over-represented processes and pathways with greatest statistical power are depicted (P-value < 0.002).
