# Supplementary material for: Discovery and Validation of Novel Biomarkers for Detection of Epithelial Ovarian Cancer
Source: MDPI journal article supplement (doi:10.3390/cells8070713), 2019-07-12
Supplement: s1 [file s1]

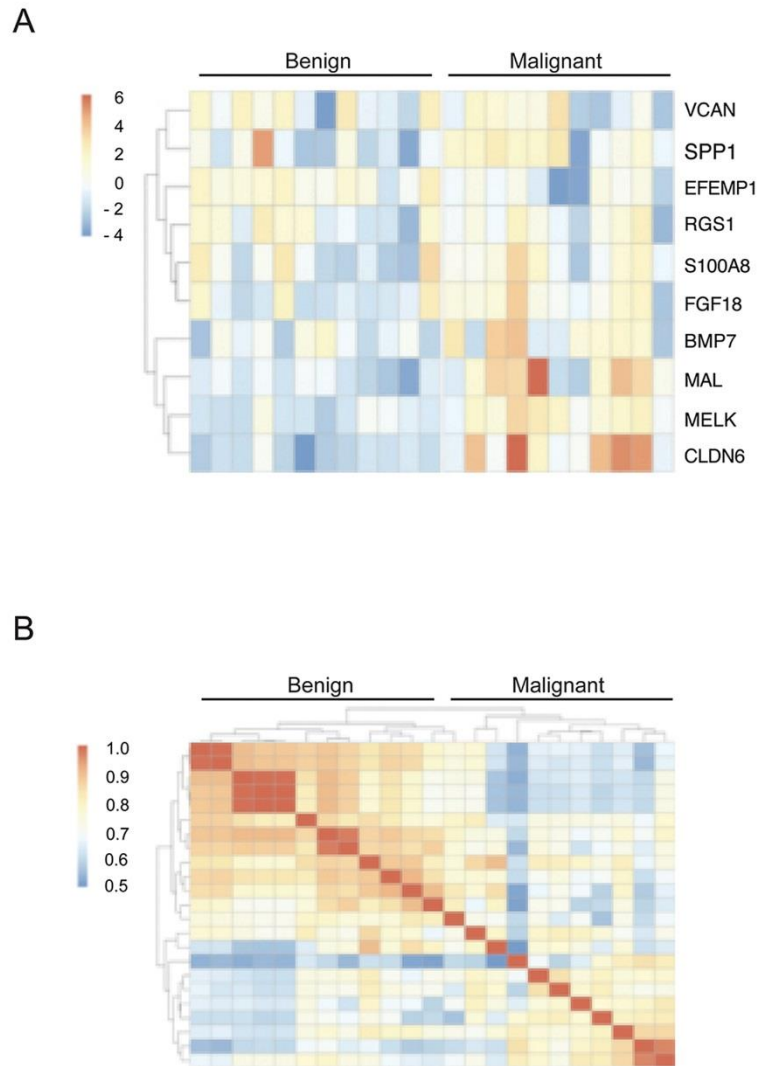

**Supplementary Figure S2: Expression-levels of candidate biomarkers and pair-wise correlation of underlying samples.** Plot A shows the absolute expression of candidate biomarkers for each sample. Plot B shows the correlation of the samples to identify outliers or incoherent clustering. The expression-correlation of the samples shows a clustering according to malignant and benign subtype, respectively, however, the expression levels of the biomarker candidates between and within groups vary and show considerable heterogeneity as shown in Plot A.
