# Supplementary material for: Discovery and Validation of Novel Biomarkers for Detection of Epithelial Ovarian Cancer
Source: MDPI journal article supplement (doi:10.3390/cells8070713), 2019-07-12
Supplement: s1 [file s1]

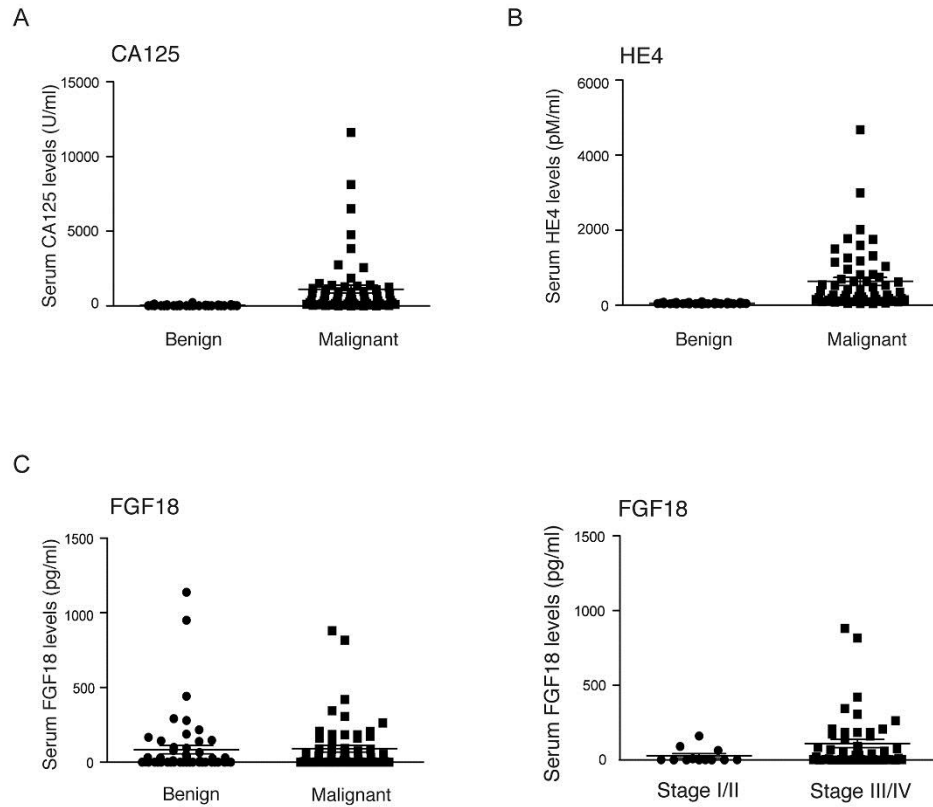

**Supplementary Figure S5. Protein expression levels of biomarkers in serum.** Levels of A) CA125, B) HE4 and C) FGF18 were determined in serum of patients with benign gynecological conditions (N=56) and ovarian cancer (N=60). All proteins were quantified using specific ELISA assays.
